# Supplementary material for: Electronic, vibrational, and optical properties of fullerene–S8 co-crystals
Source: Royal Society of Chemistry journal article supplement (doi:10.1039/d3tc03358a), 2023-01-01
Supplement: d3tc03358a1.pdf [file d3tc03358a1.pdf]

## Supporting Information

### Electronic, vibrational, and optical properties of fullerene-S<sub>8</sub> co-crystals

**Maliheh Shaban Tameh, Xiaojuan Ni,  
Veaceslav Coropceanu,\* and Jean-Luc Brédas\***

Department of Chemistry and Biochemistry  
The University of Arizona  
Tucson, Arizona 85721-0041

\* Emails: [coropceanu@arizona.edu](mailto:coropceanu@arizona.edu); [jlbredas@arizona.edu](mailto:jlbredas@arizona.edu)

## Content

**Table S1.** Largest electronic couplings (in meV) between the LUMOs of the fullerene and  $S_8$  components in the  $C_{60} - 2S_8$  co-crystal, as calculated at the PBE/6-31G (d,p) and B3LYP/6-31G (d,p) levels of theory. S3

**Table S2.** Largest electronic couplings (in meV) between the LUMOs of the fullerene and  $S_8$  components in the  $C_{70} - 2S_8$  co-crystal, as calculated at the PBE/6-31G (d,p) and B3LYP/6-31G (d,p) levels of theory. S3

**Figure S1.** Fullerene pairs used for the calculations of the transfer integrals. S4

**Table S3.** Transfer integrals for holes ( $t_h$ ) and electrons ( $t_e$ ) between the fullerene pairs shown in Figure S1, as computed at the PBE/6-31G (d,p) and B3LYP/6-31G (d,p) (in parentheses) levels of theory. All energies are in meV. S5

**Figure S2.** Comparison of the IR spectra of  $C_{60}$  obtained at the PBE/6-31G (d,p) and B3LYP/6-31G (d,p) levels of calculation. S6

**Figure S3.** Comparison of the IR spectra of  $C_{70}$  obtained at the PBE/6-31G (d,p) and B3LYP/6-31G (d,p) levels of calculation. S6

**Figure S4.** Comparison of the natural transition orbitals in the  $C_{70} - S_8$  complex for the mixed charge transfer-local exciton states with energy of (a) 2.70 eV and (b) 2.77 eV. S7

**Figure S5.** Comparison of the LC- $\omega$ HPBE/6-31G (d,p) natural transition orbitals (NTOs) in the  $C_{60} - S_8$  complex between (a) the  $C_{60}$  singlet local excited state  $S_{15}$  ( $\lambda$  value for the NTO shown is 0.66; the other relevant NTOs involve additional fullerene frontier molecular orbitals) and (b) the lowest singlet charge-transfer state ( $\lambda(\text{NTO}) = 0.81$ ), i.e., the  $S_{16}$  state. S8

**Table S4.** Singlet TD-DFT excitation energies [eV] in  $S_8-C_{60}$  and  $S_8-C_{70}$  model complexes, as calculated at the B3LYP/6-31G (d,p) level of theory. The lowest CT states in each system are indicated in bold. S9

**Table S5.** Singlet TD-DFT excitation energies [eV] in  $S_8$ ,  $C_{60}$ , and an  $S_8-C_{60}$  model complex, as calculated at the LC- $\omega$ HPBE/6-31G (d,p) level of theory. The lowest CT states in the latter system is indicated in bold. S10

**Table S1.** Largest electronic couplings (in meV) between the LUMOs of the fullerene and  $S_8$  components in the  $C_{60} - 2S_8$  co-crystal, as calculated at the PBE/6-31G (d,p) and B3LYP/6-31G (d,p) levels of theory.

| Method | Orbitals     | $t_e$ |
|--------|--------------|-------|
| PBE    | LUMO, LUMO   | 4     |
|        | LUMO, LUMO+1 | 16    |
|        | LUMO, LUMO+2 | 101   |
| B3LYP  | LUMO, LUMO   | 5     |
|        | LUMO, LUMO+1 | 22    |
|        | LUMO, LUMO+2 | 114   |

**Table S2.** Largest electronic couplings (in meV) between the LUMOs of the fullerene and  $S_8$  components in the  $C_{70} - 2S_8$  co-crystal, as calculated at the PBE/6-31G (d,p) and B3LYP/6-31G (d,p) levels of theory.

| Method | Orbitals  | $t_e$ |
|--------|-----------|-------|
| PBE    | LUMO-LUMO | 65    |
| B3LYP  | LUMO-LUMO | 76    |

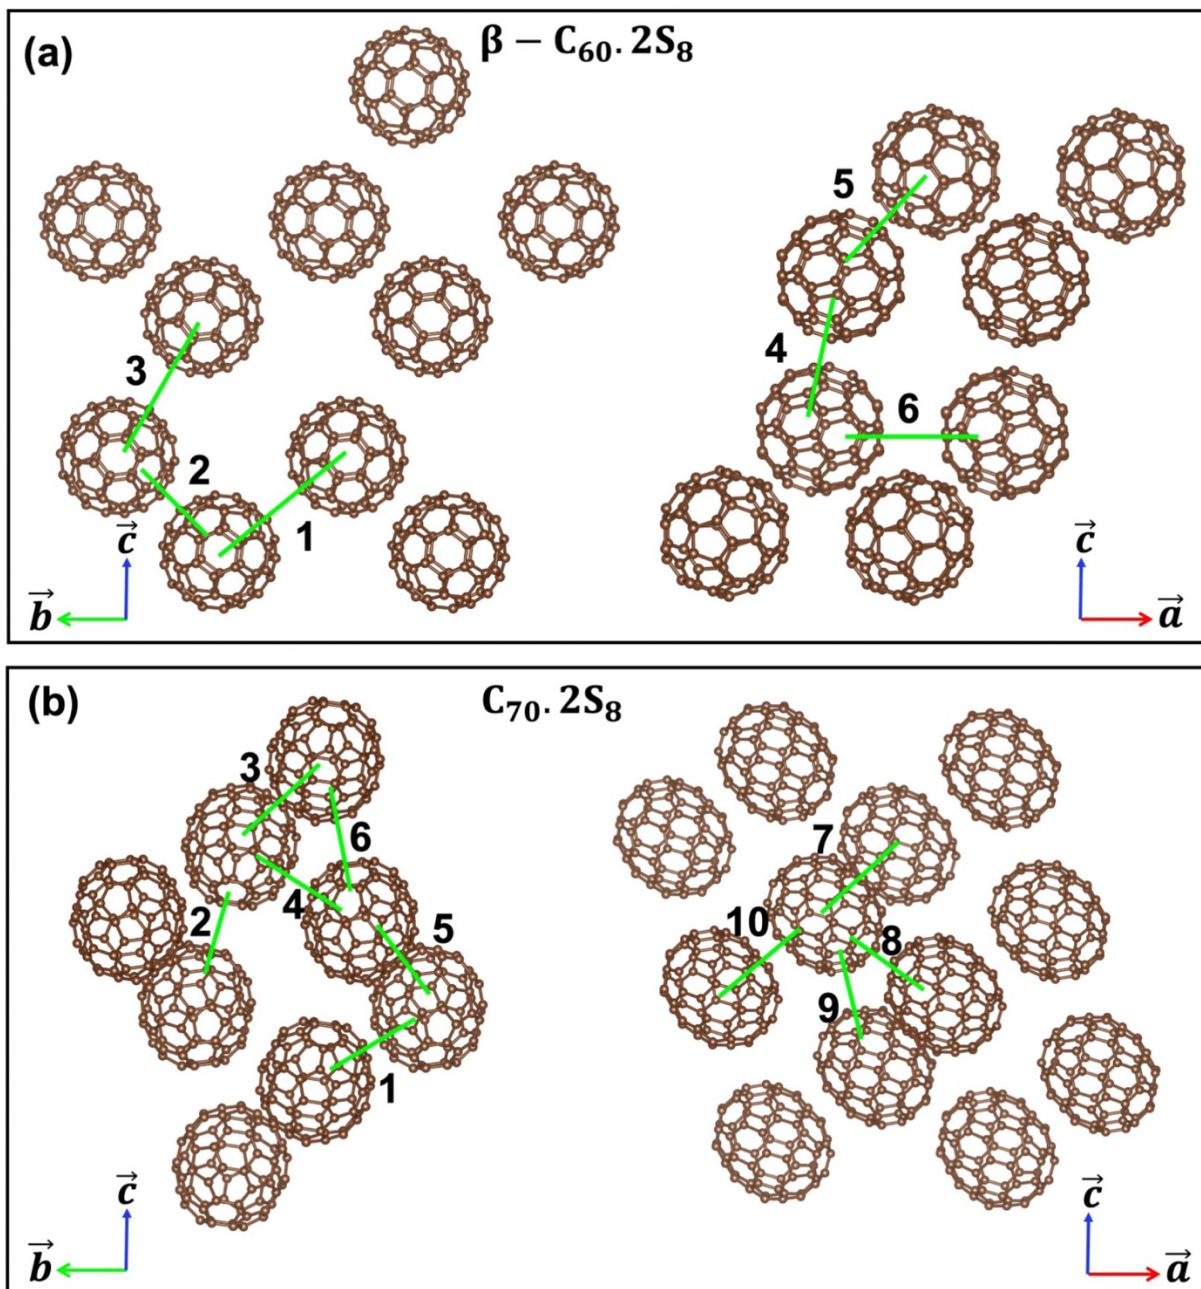

Figure S1. Fullerene pairs used for the calculations of the transfer integrals.

**Table S3.** Transfer integrals for holes ( $t_h$ ) and electrons ( $t_e$ ) between the fullerene pairs shown in Figure S1, as computed at the PBE/6-31G (d,p) and B3LYP/6-31G (d,p) (in parentheses) levels of theory. All energies are in meV.

| Pair | $C_{60}2S_8$ |         | $C_{70}2S_8$ |         |
|------|--------------|---------|--------------|---------|
|      | $t_h$        | $t_e$   | $t_h$        | $t_e$   |
| 1    | 37 (41)      | 32 (45) | 40 (35)      | 27 (29) |
| 2    | 48 (55)      | 41 (47) | 6 (6)        | 2 (2)   |
| 3    | 33 (38)      | 48(55)  | 12 (9)       | 19 (25) |
| 4    | 48 (55)      | 40 (47) | 40 (35)      | 27 (29) |
| 5    | 50 (57)      | 17 (19) | 12 (9)       | 19 (25) |
| 6    | 33 (37)      | 13 (15) | 6 (6)        | 2 (2)   |
| 7    |              |         | 40 (35)      | 27 (29) |
| 8    |              |         | 17 (20)      | 13 (15) |
| 9    |              |         | 6 (6)        | 2 (2)   |
| 10   |              |         | 12 (9)       | 19 (25) |

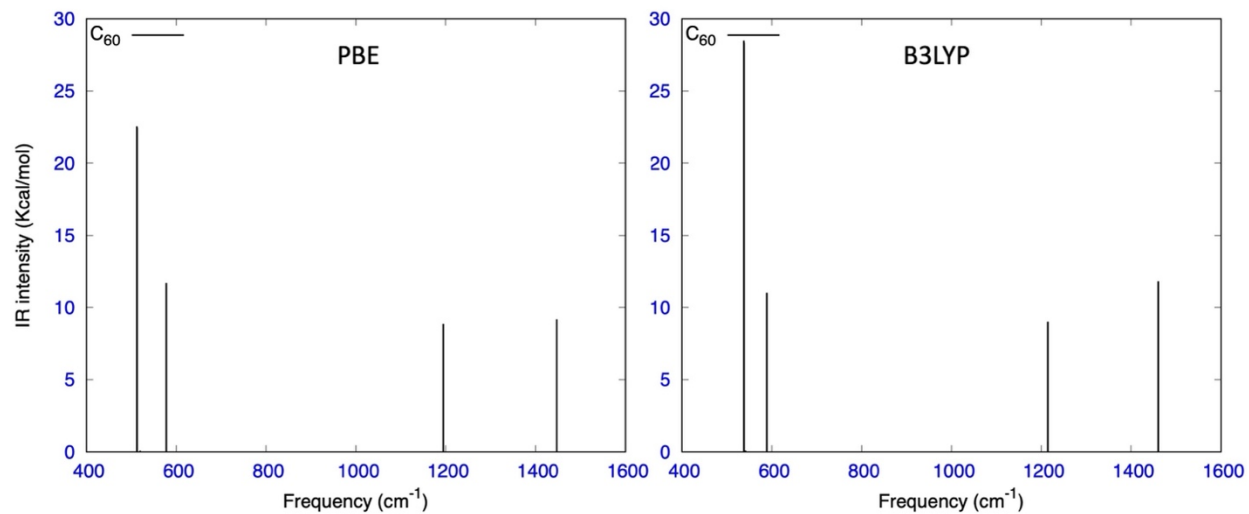

**Figure S2.** Comparison of the IR spectra of  $C_{60}$  obtained at the PBE/6-31G (d,p) and B3LYP/6-31G (d,p) levels of calculation.

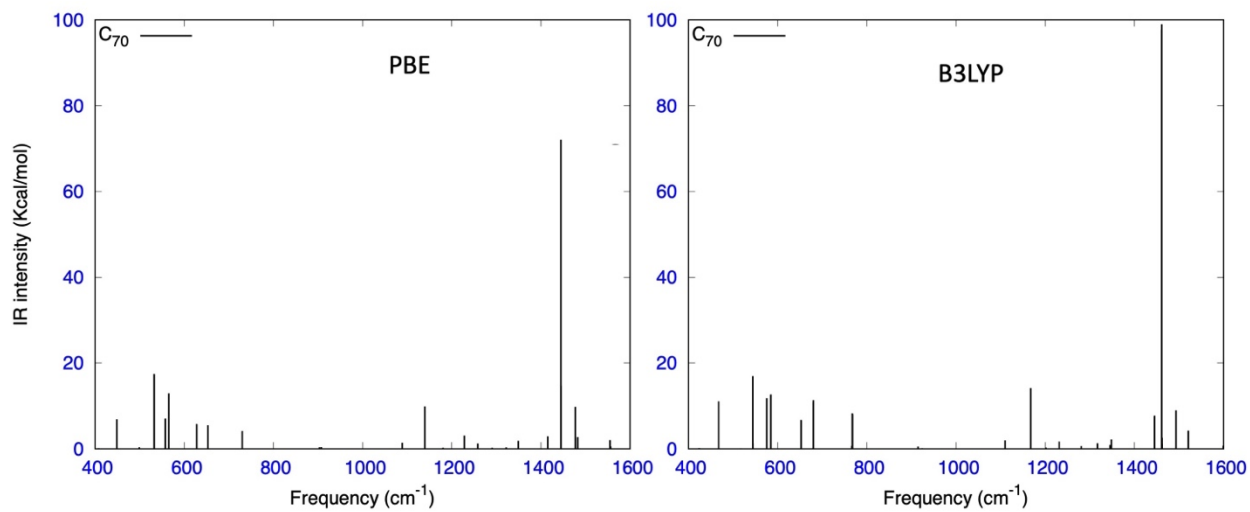

**Figure S3.** Comparison of the IR spectra of  $C_{70}$  obtained at the PBE/6-31G (d,p) and B3LYP/6-31G (d,p) levels of calculation.

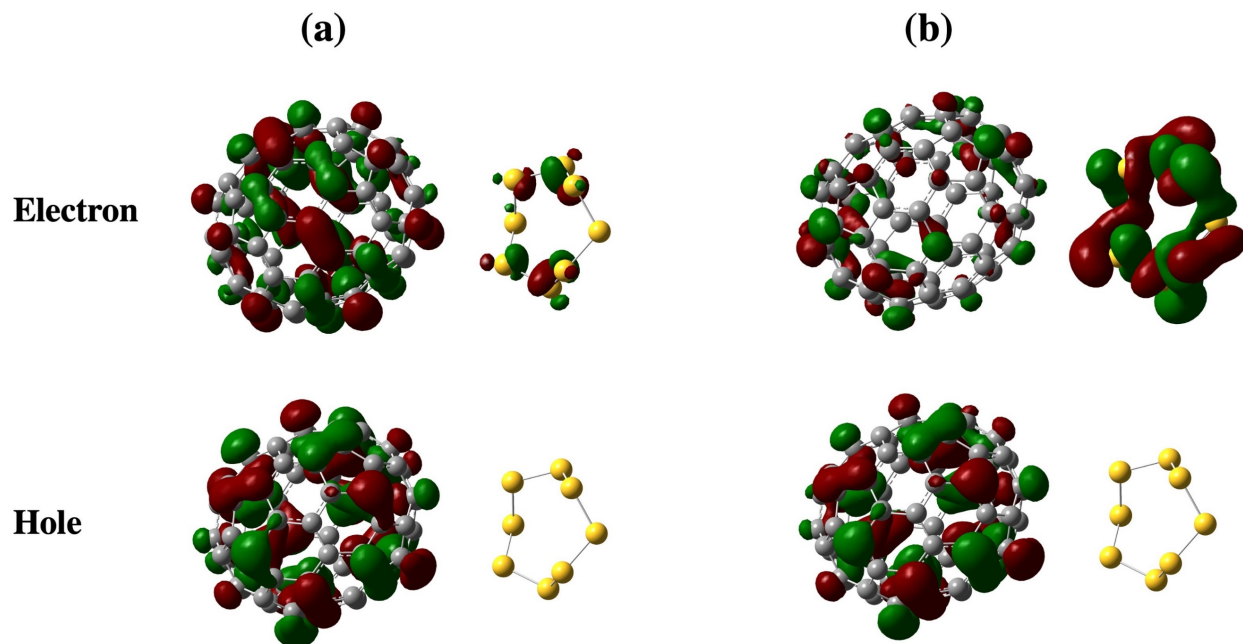

**Figure S4.** Comparison of the natural transition orbitals (NTOs) in the  $C_{70} - S_8$  complex for the mixed charge transfer-local exciton states with energies of: (a) 2.70 eV ( $S_{23}$  state;  $\lambda$  for the NTO shown is 0.64; the other major contributing NTOs correspond to transitions among fullerene frontier molecular orbitals); (b) 2.77 eV ( $S_{27}$  state;  $\lambda$  for the NTO shown is 0.55; the other major contributing NTOs correspond to transitions among fullerene frontier molecular orbitals).

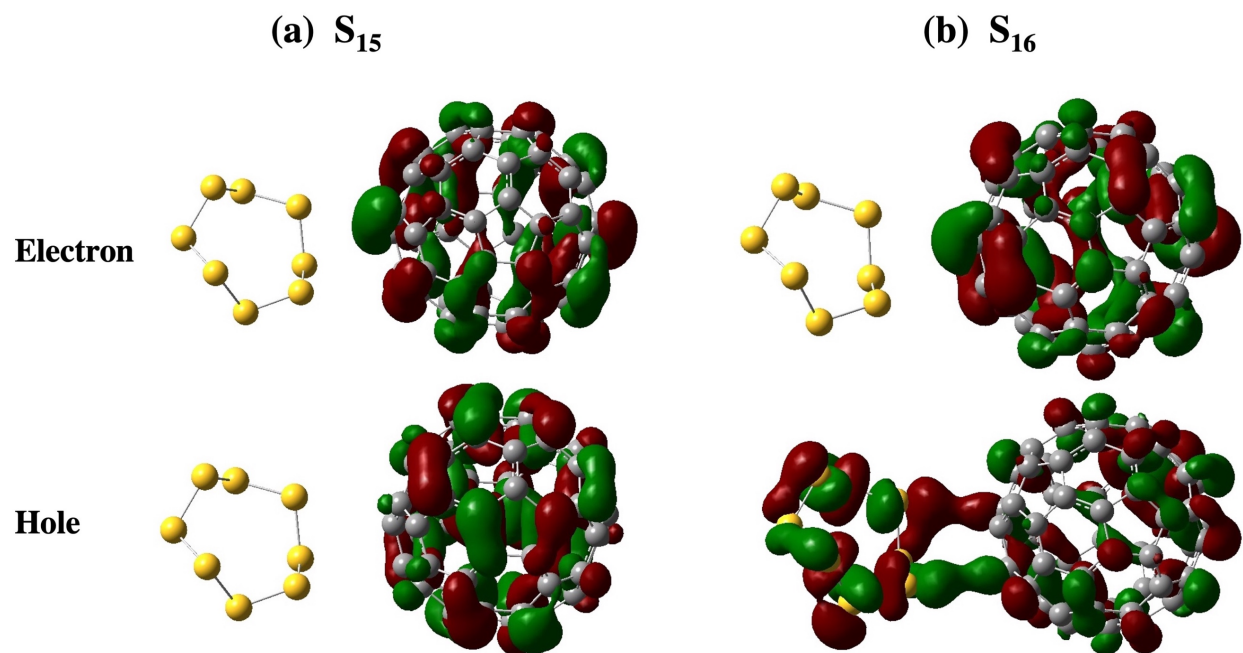

**Figure S5.** Comparison of the LC- $\omega$ HPBE/6-31G (d,p) natural transition orbitals (NTOs) in the  $C_{60} - S_8$  complex between (a) the  $C_{60}$  singlet local excited state  $S_{15}$  ( $\lambda$  value for the NTO shown is 0.66; the other relevant NTOs involve additional fullerene frontier molecular orbitals) and (b) the lowest singlet charge-transfer state ( $\lambda(\text{NTO}) = 0.81$ ), i.e., the  $S_{16}$  state.



**Table S4.** Singlet TD-DFT excitation energies [eV] in S<sub>8</sub>-C<sub>60</sub> and S<sub>8</sub>-C<sub>70</sub> model complexes, as calculated at the B3LYP/6-31G (d,p) level of theory. The lowest CT states in each system are indicated in bold.

| Transition                            | S <sub>8</sub> -C <sub>60</sub> complex (eV) | S <sub>8</sub> -C <sub>70</sub> complex (eV) |
|---------------------------------------|----------------------------------------------|----------------------------------------------|
| S <sub>0</sub> → S <sub>1</sub>       | 2.10                                         | 2.10                                         |
| S <sub>0</sub> → S <sub>2</sub>       | 2.10                                         | 2.11                                         |
| S <sub>0</sub> → S <sub>3</sub>       | 2.10                                         | 2.15                                         |
| S <sub>0</sub> → S <sub>4</sub>       | 2.10                                         | 2.16                                         |
| S <sub>0</sub> → S <sub>5</sub>       | 2.11                                         | 2.17                                         |
| S <sub>0</sub> → S <sub>6</sub>       | 2.11                                         | 2.17                                         |
| S <sub>0</sub> → S <sub>7</sub>       | 2.11                                         | 2.19                                         |
| S <sub>0</sub> → S <sub>8</sub>       | 2.11                                         | 2.34                                         |
| S <sub>0</sub> → S <sub>9</sub>       | 2.11                                         | 2.34                                         |
| S <sub>0</sub> → S <sub>10</sub>      | 2.11                                         | 2.40                                         |
| S <sub>0</sub> → S <sub>11</sub>      | 2.28                                         | 2.40                                         |
| S <sub>0</sub> → S <sub>12</sub>      | 2.28                                         | 2.49                                         |
| S <sub>0</sub> → S <sub>13</sub>      | 2.28                                         | 2.55                                         |
| S <sub>0</sub> → S <sub>14</sub>      | 2.28                                         | 2.56                                         |
| S <sub>0</sub> → S <sub>15</sub>      | 2.28                                         | 2.58                                         |
| <b>S<sub>0</sub> → S<sub>16</sub></b> | <b>2.84</b>                                  | 2.58                                         |
| S <sub>0</sub> → S <sub>17</sub>      | 2.85                                         | 2.59                                         |
| S <sub>0</sub> → S <sub>18</sub>      | 2.85                                         | 2.59                                         |
| S <sub>0</sub> → S <sub>19</sub>      | 2.86                                         | 2.67                                         |
| S <sub>0</sub> → S <sub>20</sub>      | 2.86                                         | 2.67                                         |
| S <sub>0</sub> → S <sub>21</sub>      | 2.87                                         | 2.69                                         |
| S <sub>0</sub> → S <sub>22</sub>      | 2.87                                         | 2.69                                         |
| <b>S<sub>0</sub> → S<sub>23</sub></b> | 2.87                                         | <b>2.70</b>                                  |
| S <sub>0</sub> → S <sub>24</sub>      | 2.88                                         | 2.70                                         |
| S <sub>0</sub> → S <sub>25</sub>      | 2.88                                         | 2.72                                         |
| S <sub>0</sub> → S <sub>26</sub>      | 3.16                                         | 2.77                                         |
| <b>S<sub>0</sub> → S<sub>27</sub></b> | 3.16                                         | <b>2.77</b>                                  |

**Table S5.** Singlet TD-DFT excitation energies [eV] in S<sub>8</sub>, C<sub>60</sub>, and an S<sub>8</sub>-C<sub>60</sub> model complex, as calculated at the LC- $\omega$ HPBE/6-31G (d,p) level of theory. The lowest CT state in the latter system is indicated in bold.

| Transition                            | S <sub>8</sub> (eV) | C <sub>60</sub> (eV) | S <sub>8</sub> -C <sub>60</sub> complex (eV) |
|---------------------------------------|---------------------|----------------------|----------------------------------------------|
| S <sub>0</sub> → S <sub>1</sub>       | 4.03                | 2.18                 | 2.17                                         |
| S <sub>0</sub> → S <sub>2</sub>       | 4.03                | 2.18                 | 2.17                                         |
| S <sub>0</sub> → S <sub>3</sub>       | 4.10                | 2.18                 | 2.17                                         |
| S <sub>0</sub> → S <sub>4</sub>       | 4.14                | 2.18                 | 2.17                                         |
| S <sub>0</sub> → S <sub>5</sub>       | 4.15                | 2.18                 | 2.17                                         |
| S <sub>0</sub> → S <sub>6</sub>       | 4.22                | 2.18                 | 2.18                                         |
| S <sub>0</sub> → S <sub>7</sub>       | 4.33                | 2.18                 | 2.18                                         |
| S <sub>0</sub> → S <sub>8</sub>       | 4.50                | 2.18                 | 2.18                                         |
| S <sub>0</sub> → S <sub>9</sub>       | 4.50                | 2.18                 | 2.18                                         |
| S <sub>0</sub> → S <sub>10</sub>      | 4.52                | 2.18                 | 2.18                                         |
| S <sub>0</sub> → S <sub>11</sub>      | 4.53                | 2.38                 | 2.36                                         |
| S <sub>0</sub> → S <sub>12</sub>      | 4.59                | 2.38                 | 2.37                                         |
| S <sub>0</sub> → S <sub>13</sub>      | 4.59                | 2.38                 | 2.37                                         |
| S <sub>0</sub> → S <sub>14</sub>      | 4.62                | 2.38                 | 2.37                                         |
| S <sub>0</sub> → S <sub>15</sub>      | 4.68                | 2.38                 | 2.37                                         |
| <b>S<sub>0</sub> → S<sub>16</sub></b> | 4.68                | 3.32                 | <b>3.25</b>                                  |
| S <sub>0</sub> → S <sub>17</sub>      | 4.83                | 3.32                 | 3.27                                         |
| S <sub>0</sub> → S <sub>18</sub>      | 4.98                | 3.32                 | 3.28                                         |
| S <sub>0</sub> → S <sub>19</sub>      | 4.98                | 3.32                 | 3.28                                         |
| S <sub>0</sub> → S <sub>20</sub>      | 5.02                | 3.32                 | 3.29                                         |
| S <sub>0</sub> → S <sub>21</sub>      | 5.02                | 3.32                 | 3.30                                         |
| S <sub>0</sub> → S <sub>22</sub>      | 5.31                | 3.32                 | 3.30                                         |
| S <sub>0</sub> → S <sub>23</sub>      | 5.41                | 3.32                 | 3.31                                         |
| S <sub>0</sub> → S <sub>24</sub>      | 5.41                | 3.41                 | 3.33                                         |
| S <sub>0</sub> → S <sub>25</sub>      | 5.42                | 3.41                 | 3.34                                         |
| S <sub>0</sub> → S <sub>26</sub>      | 5.42                | 3.41                 | 3.34                                         |
| S <sub>0</sub> → S <sub>27</sub>      | 5.46                | 3.41                 | 3.36                                         |

## Reference

1. Bethune, D. S.; Meijer, G.; Tang, W. C.; Rosen, H. J.; Golden, W. G.; Seki, H.; Brown, C. A.; de Vries, M. S., Vibrational Raman and infrared spectra of chromatographically separated C<sub>60</sub> and C<sub>70</sub> fullerene clusters. *Chemical Physics Letters* **1991**, *179* (1-2), 181-186.
